# Supplementary material for: Definitive re-irradiation of locally recurrent esophageal cancer after trimodality therapy in patients with a poor performance status
Source: PubMed Central journal article supplement — Mol Clin Oncol. 2020 May 11;13(1):27–32. doi: 10.3892/mco.2020.2044 (PMC7241232; doi:10.3892/mco.2020.2044), 2020-05-11
Supplement: Supplementary_Data.pdf [file Supplementary_Data.pdf]

Table S1. Previous reports on re-irradiation of locoregional esophageal cancer.

| Author, year                  | No  | Re-irradiation interval, mo | Initial dose, Gy | Re-irradiation dose, Gy | Patients receiving concurrent chemotherapy (%) | Median follow-up, mo                    | Results                                            | Toxicity (acute=within 3 mo)                                                                 | (Refs.) |
|-------------------------------|-----|-----------------------------|------------------|-------------------------|------------------------------------------------|-----------------------------------------|----------------------------------------------------|----------------------------------------------------------------------------------------------|---------|
| Katano <i>et al</i> , 2017    | 6   | 17.4                        | 50.4             | 30-50.4; mean, 42.63    | 83.30                                          | NR                                      | MST 13.6 mo                                        | Acute grade 1-2: 50%<br>Acute grade 3-5: 50%<br>Late grade 1-2: 50%<br>Late grade 3-5: 16.6% | (7)     |
| Kim <i>et al</i> , 2012       | 10  | 15.6                        | 50.4             | 44-50.4; mean, 46.5     | 30                                             | 4.9                                     | MST NR.<br>At 3 mo: 20% CR, 10% PR, 20% SD, 50% PD | Acute grade 1-2: 90%<br>Acute grade 3-5: 30%.<br>Late grade 1-2: 10%<br>Late grade 3-5: 0%   | (3)     |
| Yamashita <i>et al</i> , 2017 | 237 | 11.9                        | 50-50.4          | 60                      | 84                                             | 15 overall, 29.6 for 93 living patients | MST 21.6 mo                                        | Acute grade 1-2: NR<br>Acute grade 3-5: 2.9%<br>Late grade 1-2: NR<br>Late grade 3-5: 1.7%   | (4)     |

No, number of patients; mo, month; NR, not reported; MST, median survival time; CR, complete response; PR, partial response; SD, stable disease; PD, progressive disease.
